# Supplementary material
Source: PubMed Central journal article supplement (PMC4785921)
Supplement: rsbl20150829supp1.pdf [file rsbl20150829supp1.pdf]

## Online Supplementary Material for:

### **Blood transcriptomes reveal novel parasitic zoonoses circulating in Madagascar's lemurs**

Peter A. Larsen, Corinne E. Hayes, Cathy V. Williams, Randall E. Junge, Josia Razafindramanana, Vanessa Mass, Hajanirina Rakotondrainibe, and Anne D. Yoder

#### **S1. Molecular Methods**

Whole blood from three *Indri indri* and three *Propithecus diadema* was preserved in Tempus™ Blood RNA Tubes (Life Technologies, Grand Island, NY). Total RNA was extracted from each sample using the Tempus™ Spin RNA Isolation Kit (Life Technologies, Grand Island, NY). Globin mRNA was reduced using the GLOBINclear Kit (Life Technologies, Grand Island, NY) and custom designed lemur globin capture oligo mix (10 pmol/ul; Table S3). Globin depleted RNA was then purified using the RNA Clean & Concentrator Kit (Zymo Research, Irvine, CA). RNA quality was checked using an Agilent 2100 Bioanalyzer and RNA integrity numbers ranged from 7.3 to 9.3 (Figure S1). For each sample, 100ng of RNA was used for RNA-seq library construction (~300 bp fragment size) following the Illumina Stranded RNA-Seq + Ribozero Gold (Human/Mouse/Rat) protocol. Samples were barcoded, pooled, and sequenced on one Illumina HiSeq 2000 lane (100bp PE). Illumina library preparation and sequencing was performed at the Duke Genome Sequencing Shared Resource (Duke Center for Genomic and Computational Biology, Duke University). All raw data generated for this study have been deposited in the Sequence Read Archive under BioProject number PRJNA293089.

## S2. Bioinformatics

Raw reads were quality filtered (including Illumina adapter removal) using Trimmomatic v0.32 software [1]. Leading and trailing bases with quality scores < 20 were trimmed from each read and a sliding window of 4 bases with minimum 20 was implemented (minimum trimmed sequence length 70bp). Illumina HiSeq sequencing resulted in approximately 37 million 100bp read pairs per sample and, of these, ~76% survived quality filtering (Table S4).

For each individual, BMap software ([www.bmap.sourceforge.net](http://www.bmap.sourceforge.net)) was used to map filtered reads to the *Microcebus murinus* draft genome (GenBank assembly accession: GCA\_000165445.1) and all unmapped reads were retained for downstream analyses (Table S4). Using this approach, approximately 32% of all reads mapped and an average of 38.25 million unmapped reads were used for *de novo* transcriptome assembly for each of the six samples (Table S4). *De novo* transcriptome assemblies of unmapped reads were performed using the Trinity v2.0 software package [2].

Approximately 352,000 assembled transcripts were observed across the six samples (Table S5). Each transcriptome assembly was imported into the Galaxy software platform [3-5] and was filtered to a minimum contig length of 300 bp. Transcriptome contigs were then grouped according to taxonomic classification within Galaxy using Megablast for preliminary taxonomic identifications (nt database, word size = 16, perc\_identity = 95.0, evalue = 1e-06). All non-mammalian reads were screened for vector-borne parasites and associated sequences were retained for downstream phylogenetic analyses. The Megablast results provided an initial taxonomic identification to the family and genus level. Using this workflow, we identified *de novo* assemblies of ribosomal RNA and mitochondrial genes for parasites discussed herein.

The Trinity assemblies were then independently confirmed by mapping the filtered Illumina sequence data to closely related genomes/sequences (identified using the Megablast output described above) with the TopHat software package (<https://ccb.jhu.edu/software/tophat/index.shtml>; Table S6) [6]. TopHat mapping results are presented in Table S6. For each of the six individual blood transcriptomes, reads mapping to ribosomal 18S and 28S (*Babesia*) 16S and 23S (*Borrelia* and *Candidatus Neoehrlichia*), 18S and 28S-Alpha (*Trypanosoma*) and the mitochondrial cytochrome oxidase I and cytochrome-*b* genes (*Plasmodium*) were aligned to Trinity contigs. This process allowed us to 1) confirm the accuracy of the *de novo* Trinity contigs 2) examine intra-individual genetic variation of the pathogens that might indicate multiple strains circulating within a single host. Maximum Likelihood phylogenetic analyses were performed using available rRNA genes and the mitochondrial COI gene for closely related sequences available in the published literature and on GenBank (Fig. 2; FigS2) using RAxML v.8 software (-m GTRGAMMAI -# 500) [7]. Transcriptome contigs used for phylogenetic analyses were submitted to GenBank under the accession numbers (KT722781-KT722795) and all contigs assembled using filtered RNA-Seq data are provided on Dryad. [Number pending acceptance]

### S3. Supplementary References

- 1 Bolger, A.M., Lohse, M. & Usadel, B. 2014 Trimmomatic: a flexible trimmer for Illumina sequence data. *Bioinformatics*, btu170.
- 2 Grabherr, M.G., Haas, B.J., Yassour, M., Levin, J.Z., Thompson, D.A., Amit, I., Adiconis, X., Fan, L., Raychowdhury, R. & Zeng, Q. 2011 Full-length transcriptome assembly from RNA-Seq data without a reference genome. *Nature biotechnology* **29**, 644-652.
- 3 Goecks, J., Nekrutenko, A. & Taylor, J. 2010 Galaxy: a comprehensive approach for supporting accessible, reproducible, and transparent computational research in the life sciences. *Genome Biol* **11**, R86.
- 4 Blankenberg, D., Kuster, G.V., Coraor, N., Ananda, G., Lazarus, R., Mangan, M., Nekrutenko, A. & Taylor, J. 2010 Galaxy: a web - based genome analysis tool for experimentalists. *Current protocols in molecular biology*, 19.10. 11-19.10. 21.
- 5 Giardine, B., Riemer, C., Hardison, R.C., Burhans, R., Elnitski, L., Shah, P., Zhang, Y., Blankenberg, D., Albert, I. & Taylor, J. 2005 Galaxy: a platform for interactive large-scale genome analysis. *Genome research* **15**, 1451-1455.
- 6 Trapnell, C., Pachter, L. & Salzberg, S.L. 2009 TopHat: discovering splice junctions with RNA-Seq. *Bioinformatics* **25**, 1105-1111.
- 7 Stamatakis, A. 2014 RAxML version 8: a tool for phylogenetic analysis and post-analysis of large phylogenies. *Bioinformatics* **30**, 1312-1313.
- 8 Lack, J.B., Reichard, M.V., and Van Den Bussche, R.A. 2012. Phylogeny and evolution of the Piroplasmida as inferred from 18S rRNA sequences. *International Journal of Parasitology* **42**, 353-363.
- 9 Lima, L., Espinosa-Álvarez, O., Hamilton, P.B., Neves, L., Takata, C.S., Campaner, M., Attias, M., de Souza, W., Camargo, E.P. & Teixeira, M.M. 2013 Trypanosoma livingstonei: a new species from African bats supports the bat seeding hypothesis for the Trypanosoma cruzi clade. *Parasit Vectors* **6**, 221.

#### S4. Supplementary Figures

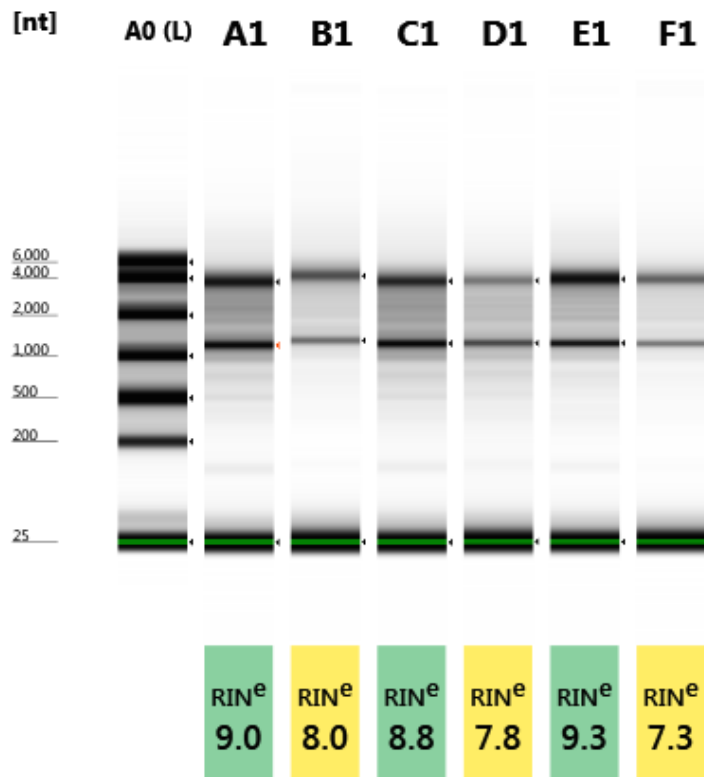

**Figure S1.** Agilent Bioanalyzer quality RIN scores for six lemur RNA blood extractions.

Lane identifications (see Fig 1 and Table 1 in main text): A1: *Indri indri* 1; B1:

*Propithecus diadema* 1, C1: *I. indri* 2; D1: *I. indri* 3; E1: *P. diadema* 2; F1: *P. diadema* 3.

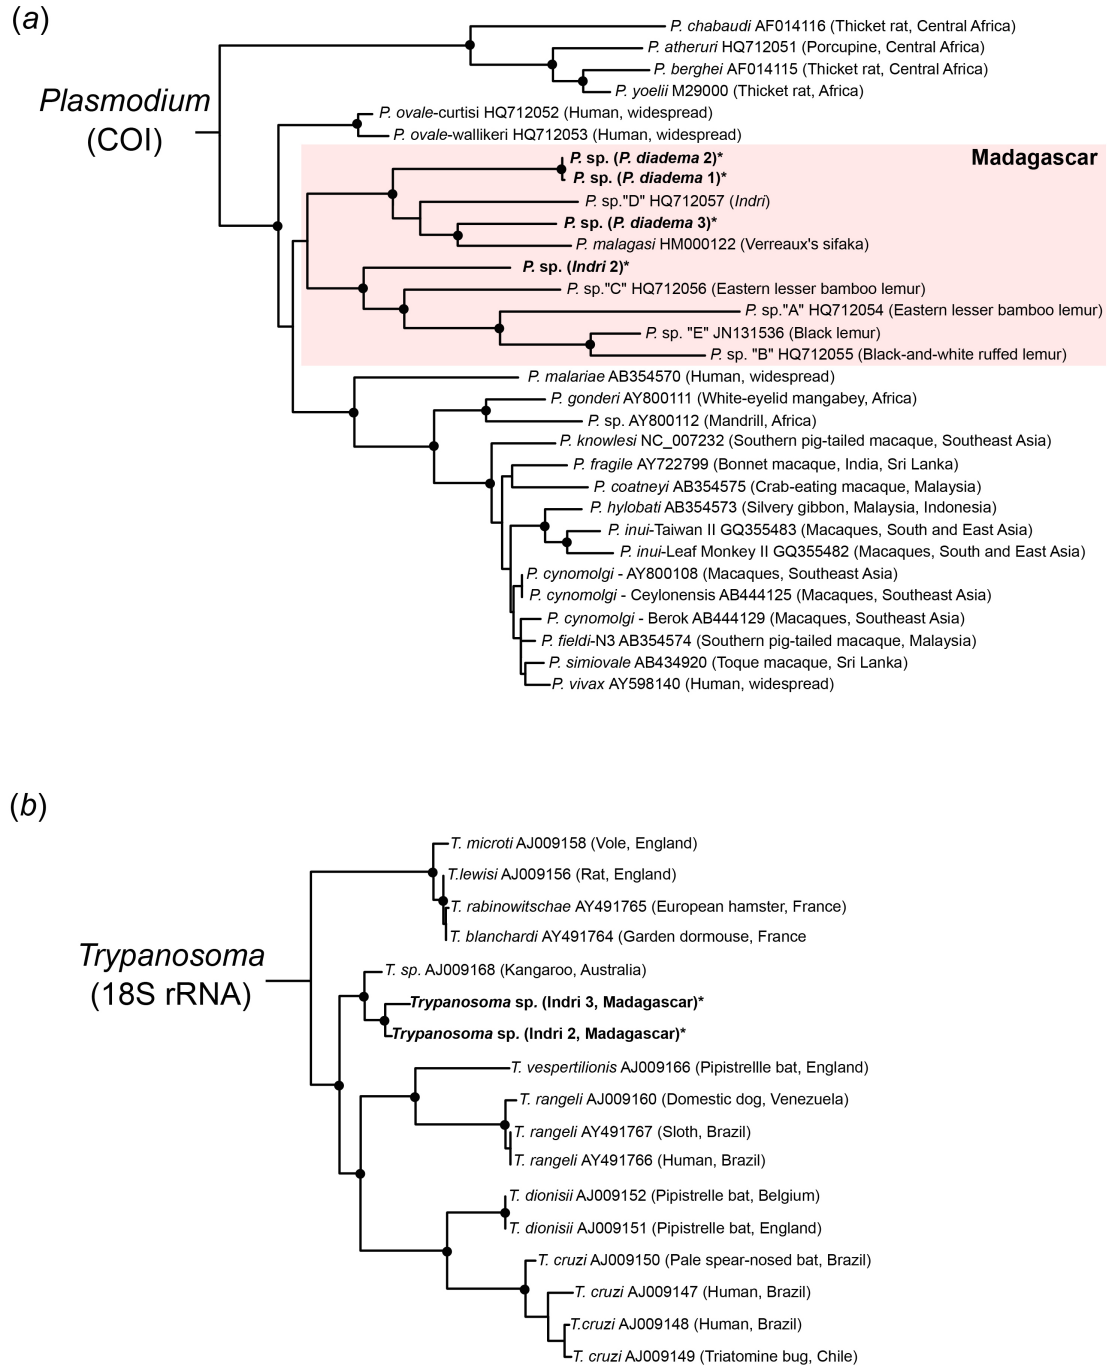

**Figure S2.** ML phylogenies of *Plasmodium* (A) and *Trypanosoma* (B). Taxa in bold were identified from *I. indri* and *P. diadema* (table 1; figure 1). Black circles identify statistically supported nodes (>75% BS). a: Phylogeny based on mitochondrial COI gene sequence

variation. Red shading highlights a clade of *Plasmodium* endemic to Madagascar. *b*: Phylogeny based on 18S ribosomal RNA. The trypanosome sequences identified in our sample are within the '*T. cruzi* Clade' (sensu Lima *et al.* 2013 [9]) and share ~1.7% genetic similarity to an unidentified species from Australia.

**Table S1.** Number of base substitutions per site from averaging over sequence pairs between putative species of *Babesia* (see Figure 1A). Intra- (diagonal) and inter- (below diagonal) genetic distance values were generated using the Kimura 2-parameter model.

|                                     | 1     | 2     | 3     | 4     | 5     |
|-------------------------------------|-------|-------|-------|-------|-------|
| 1) <i>Babesia</i> sp.<br>Madagascar | -     |       |       |       |       |
| 2) <i>B.</i> sp. South Africa       | 0.020 | 0.007 |       |       |       |
| 3) <i>B. leo</i>                    | 0.021 | 0.010 | 0.006 |       |       |
| 4) <i>B. rodhaini</i>               | 0.030 | 0.023 | 0.028 | 0.005 |       |
| 5) <i>B. microti</i>                | 0.032 | 0.019 | 0.023 | 0.024 | 0.001 |



**Table S2.** Number of base substitutions per site from averaging over sequence pairs between putative species of *Borrelia* (see Figure 1A). Intra- (diagonal) and inter- (below diagonal) genetic distance values were generated using the Kimura 2-parameter model.

|                                      | 1     | 2     | 3     | 4     | 5     |
|--------------------------------------|-------|-------|-------|-------|-------|
| 1) <i>Borrelia</i> sp.<br>Madagascar | -     |       |       |       |       |
| 2) <i>B. theileri</i>                | 0.010 | 0.005 |       |       |       |
| 3) <i>B. lonestari</i>               | 0.016 | 0.011 | 0.002 |       |       |
| 4) <i>B. miyamotoi</i>               | 0.020 | 0.014 | 0.019 | 0.006 |       |
| 5) <i>B. coriaceae</i>               | 0.021 | 0.016 | 0.018 | 0.020 | 0.004 |

**Table S3.** Lemur specific biotinylated probes used for hemoglobin reduction. Probes were designed based on predicted Alpha and Beta hemoglobin genes annotated in the genomes of *Microcebus murinus* (NCBI Genome ID 777) and *Propithecus coquereli* (NCBI Genome ID 24390).

| <b>Probe Name</b> | <b>Sequence</b>                            |
|-------------------|--------------------------------------------|
| Mmurinus_Alpha1   | /5Biosg/CTC CAG GGC CTC SGC GCC ATY GTC    |
| Mmurinus_Alpha2   | /5Biosg/TGG TGG TGG GGA AGG AMW GGA ACA    |
| Mmurinus_Alpha3   | /5Biosg/TGT CGA AGT GGG AGA AGT AGG TCT    |
| Mmurinus_Beta1    | /5Biosg/CAT AAY AGC AGA AGG AGA GGA CAG G  |
| Mmurinus_Beta2    | /5Biosg/CCA CAG AGA GST GAC ATG ASC A      |
| PcoqAlpha1        | /5Biosg/CTR CCA CCC ACT CAG ACT TTA TTC AA |
| PcoqAlpha2        | /5Biosg/CCC AGT GCG TCG GCC MCC TTC TT     |
| PcoqAlpha3        | /5Biosg/GGT CGA AGT GGG GGA AGT AGG TCT    |
| PcoqBeta1         | /5Biosg/CCA CAG GCY GGT GAC CTG AGC A      |
| PcoqBeta2         | /5Biosg/CAT GAC AGC AGA AGG AGA GGA CAG G  |
| PcoqBeta3         | /5Biosg/CCA TCG CTA AAA GCA CTC AGC ACC    |

**Table S4.** Quality filtering of Illumina paired end sequences and BBEEdit mapping results.

|                     | <b>Raw Read Pairs</b> | <b>Surviving Read Pairs</b> | <b>Mapped Reads</b> | <b>Unmapped Reads</b> |
|---------------------|-----------------------|-----------------------------|---------------------|-----------------------|
| <i>I. indri</i> 1   | 40250092              | 30691320                    | 17047480            | 44335160              |
| <i>I. indri</i> 2   | 41210410              | 31560150                    | 20510476            | 42609824              |
| <i>I. indri</i> 3   | 40547995              | 30228397                    | 17610902            | 42845892              |
| <i>P. diadema</i> 1 | 37966647              | 28809033                    | 19334938            | 38283128              |
| <i>P. diadema</i> 2 | 32356236              | 24067307                    | 16468370            | 31666244              |
| <i>P. diadema</i> 3 | 31620419              | 23940419                    | 18117468            | 29763370              |

**Table S5.** Trinity *de novo* transcriptome assemblies of six blood samples. The Trinity software package groups *de novo* assembled transcripts into clusters (or ‘genes’) based on sequence similarity (Assembled Clusters column) and then identifies putative transcript variants (or isoforms) within those clusters (Assembled Cluster Transcripts column). The contig N50 statistic indicates that 50% of the assembled transcripts were at least 755 base pairs in length (averaged across the six assemblies).

|                     | <b>Total Assembled Bases</b> | <b>Assembled Clusters</b> | <b>Assembled Cluster Transcripts</b> | <b>Contig N50 (bp)</b> |
|---------------------|------------------------------|---------------------------|--------------------------------------|------------------------|
| <i>I. indri</i> 1   | 211038196                    | 320386                    | 346321                               | 769                    |
| <i>I. indri</i> 2   | 195066403                    | 297049                    | 321021                               | 768                    |
| <i>I. indri</i> 3   | 236624006                    | 356483                    | 385263                               | 779                    |
| <i>P. diadema</i> 1 | 237565028                    | 357108                    | 384818                               | 790                    |
| <i>P. diadema</i> 2 | 209034719                    | 328019                    | 351557                               | 737                    |
| <i>P. diadema</i> 3 | 188197365                    | 306565                    | 327746                               | 692                    |

**Table S6.** TopHat mapping results. Values in each column indicate the number of filtered Illumina RNA-Seq sequences that mapped to reference sequences (column 2).

| <b>Reference Species</b>     | <b>NCBI ID</b> | <b><i>I. indri</i> 1</b> | <b><i>I. indri</i> 2</b> | <b><i>I. indri</i> 3</b> | <b><i>P. diadema</i> 1</b> | <b><i>P. diadema</i> 2</b> | <b><i>P. diadema</i> 3</b> |
|------------------------------|----------------|--------------------------|--------------------------|--------------------------|----------------------------|----------------------------|----------------------------|
| <i>Babesia microti</i>       | GCA_00691945   | 7,611                    | 63,379                   | 56,906                   | 46,228                     | 32,337                     | 100,568                    |
| <i>Borrelia miyamotoi</i>    | GCA_000445425  | 12,352                   | 0                        | 1                        | 5                          | 3                          | 6                          |
| <i>Ehrlichia ruminantium</i> | GCA_000026005  | 208                      | 26                       | 1                        | 2                          | 2                          | 3782                       |
| <i>Trypanosoma cruzi</i>     | GCA_000209065  | 6,761                    | 75,279                   | 58,091                   | 28,364                     | 17,661                     | 35,494                     |
| <i>Plasmodium knowlesi</i>   | GCA_000006355  | 5,002                    | 54,938                   | 24,971                   | 40,240                     | 26,600                     | 46,739                     |

**Table S7.** Number of sequences mapping to ribosomal and mitochondrial genes for parasites discussed herein. The first value is the number of contigs, followed by number of supporting RNA-Seq sequences in parentheses, and finally the total length of contigs in base pairs.

|                        | <i>I. indri 1</i>  | <i>I. indri 2</i>   | <i>I. indri 3</i>    | <i>P. diadema 1</i> | <i>P. diadema 2</i> | <i>P. diadema 3</i>  |
|------------------------|--------------------|---------------------|----------------------|---------------------|---------------------|----------------------|
| <b>Babesia</b>         |                    |                     |                      |                     |                     |                      |
| 18S                    | 5 (88) 609 bp      | 6 (2,244) 1,238 bp  | 6 (3,286) 1,233bp    | 5 (530) 1,040 bp    | 6 (932) 1,201 bp    | 5 (8,565) 1,491 bp   |
| 28S                    | 7 (3,589) 905 bp   | 8 (13,968) 2,012 bp | 13 (12,400) 2,158 bp | 10 (7,954) 1,683 bp | 8 (8,930) 1,880 bp  | 10 (17,052) 2,149 bp |
| <b>Borrelia</b>        |                    |                     |                      |                     |                     |                      |
| 16S                    | 2 (3,521) 1648 bp  |                     |                      |                     |                     |                      |
| 23S                    | 5 (8,639) 2,828 bp |                     |                      |                     |                     |                      |
| <b>C. Neoehrlichia</b> |                    |                     |                      |                     |                     |                      |
| 16S                    | 4 (35) 497 bp      |                     |                      |                     |                     | 7 (538) 900 bp       |
| 23S                    | 7 (173) 899 bp     |                     |                      |                     |                     | 8 (3241) 1,740 bp    |
| <b>Plasmodium</b>      |                    |                     |                      |                     |                     |                      |
| COI                    |                    | 1 (498) 1,431 bp    |                      | 4 (227) 1,431 bp    | 1 (215) 1,431 bp    | 1 (311) 1,431 bp     |
| Cyt-b                  |                    | 1 (496) 1,131 bp    |                      | 2 (152) 1,131 bp    | 1 (127) 1,131 bp    | 1 (149) 1,131 bp     |
| <b>Trypanosoma</b>     |                    |                     |                      |                     |                     |                      |
| 18S                    |                    | 1 (348) 1,128 bp    | 4 (1,145) 1,140 bp   |                     |                     |                      |
| 28S-Alpha              |                    | 3 (3,468) 1,421 bp  | 5 (3,129) 1,544 bp   |                     |                     |                      |
